# Supplementary material for: Paradoxical sleep deprivation impairs mouse survival after infection with malaria parasites
Source: PubMed Central journal article supplement (PMC4416287; doi:10.1186/s12936-015-0690-7), 2015-04-28

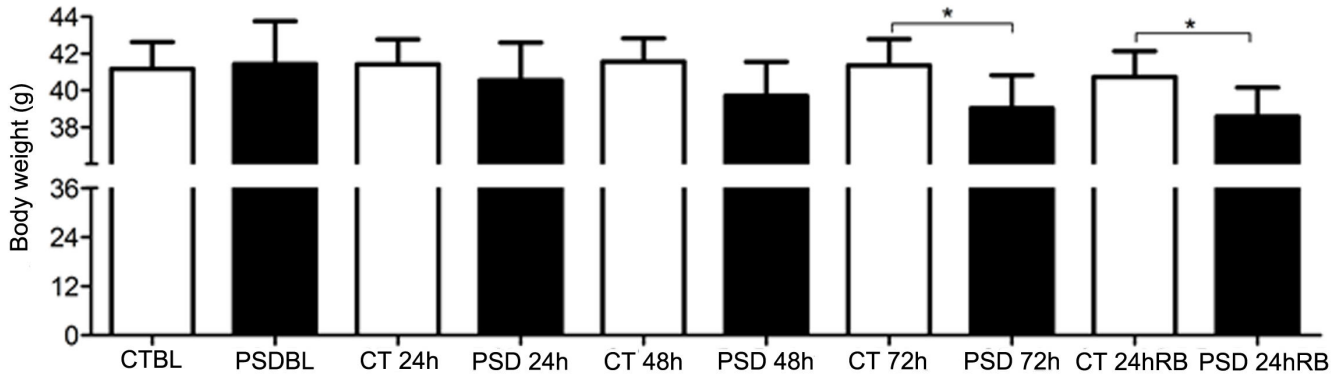

Supplement: 12936_2015_690_MOESM1_ESM.pdf [file 12936_2015_690_MOESM1_ESM.pdf]
